# Supplementary material for: Equine major histocompatibility complex class I molecules act as entry receptors that bind to equine herpesvirus-1 glycoprotein D
Source: PubMed Central journal article supplement (PMC3118799; doi:10.1111/j.1365-2443.2011.01491.x), 2011-04

1 **FIGURE LEGENDS OF SUPPORTING INFORMATION**

2 **Figure S1.** Flow cytometric detection of MHC class I expression on E. Derm, EBMECs  
3 and PBMC cells stained with anti-MHC class I antibody PT85A (red), H58A (blue),  
4 B5C (orange), or isotype controls IgG2a and IgG2b (black and gray, respectively).

5

6 **Figure S2.** Cellular ATP levels of each cell line with or without the ATP depletion  
7 treatment. RK13, 3T3-A68, CHO-K1 and E. Derm cells were incubated with ATP  
8 depletion media (open circles) or DMEM control media (solid squares) for the indicated  
9 time periods. Cellular ATP was measured with the CellTiter-Glo luminescent cell  
10 viability assay. Error bars represent standard deviations.

11

Fig. S1

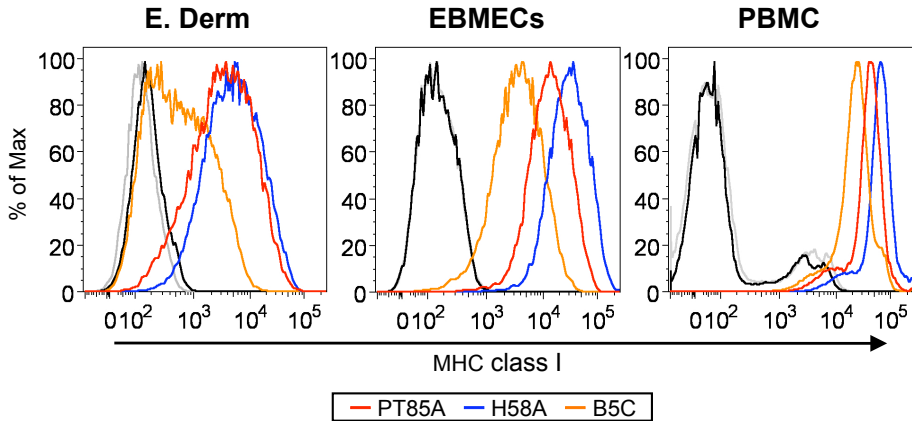

Fig. S2

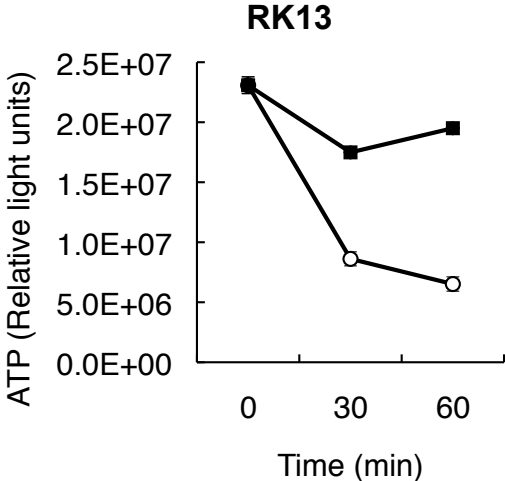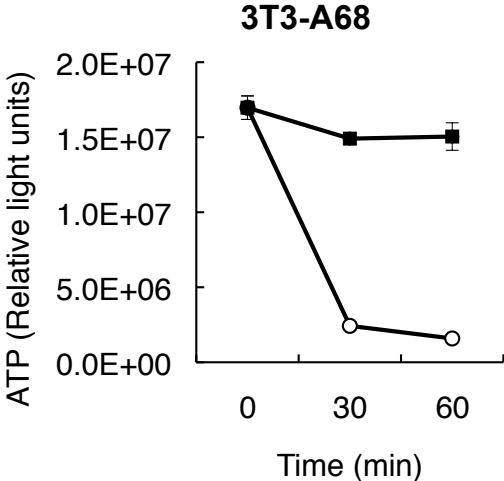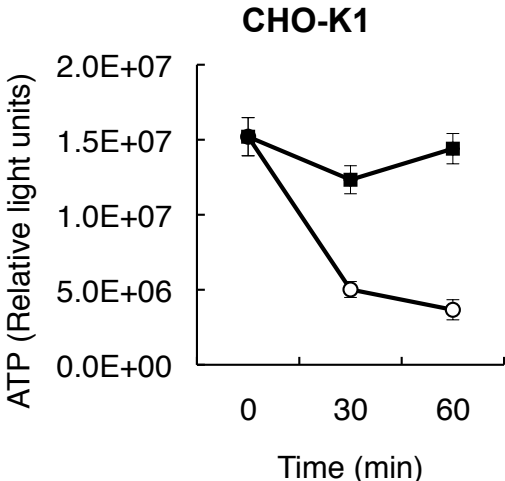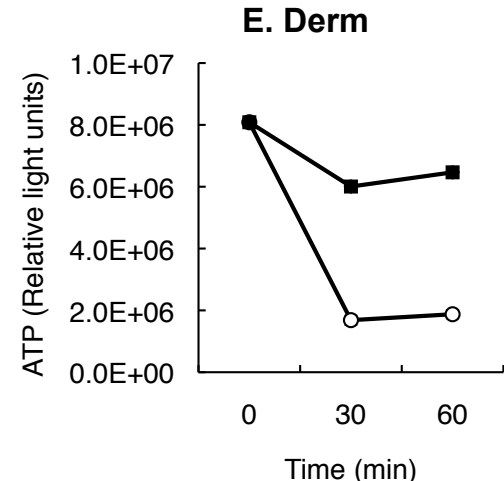

Supplement: gtc0016-0343-SD1.pdf [file gtc0016-0343-SD1.pdf]
