# Supplementary material for: Equine major histocompatibility complex class I molecules act as entry receptors that bind to equine herpesvirus-1 glycoprotein D
Source: PubMed Central journal article supplement (PMC3118799; doi:10.1111/j.1365-2443.2011.01491.x), 2011-04
Supplement: gtc0016-0343-SD2.pdf [file gtc0016-0343-SD2.pdf]

**Table S1** Cellular entry pathways of EHV-1

| Cell types                                   | Species | Entry pathways                | Receptor molecules       | References                                                  |
|----------------------------------------------|---------|-------------------------------|--------------------------|-------------------------------------------------------------|
| Equine aortic endothelial cells              | Horse   | Direct fusion                 | Unclear                  | Van de Walle et al. (2009)                                  |
| Equine brain microvascular endothelial cells | Horse   | Endocytosis                   | MHC class I              | Hasebe et al. (2006), Hasebe et al. (2009), Current study   |
| Equine peripheral blood mononuclear cells    | Horse   | Endocytosis                   | MHC class I and Integrin | Van de Walle et al. (2009), Current study                   |
| E. Derm cells                                | Horse   | Direct fusion and Endocytosis | MHC class I              | Frampton et al. (2007), Hasebe et al. (2009), Current study |
| CHO-K1 cells                                 | Hamster | Endocytosis                   | Integrin                 | Frampton et al. (2007), Van de Walle et al. (2009)          |
| RK13 cells                                   | Rabbit  | Direct fusion                 | Unclear                  | Frampton et al. (2007)                                      |
