# Supplementary material for: Equine major histocompatibility complex class I molecules act as entry receptors that bind to equine herpesvirus-1 glycoprotein D
Source: PubMed Central journal article supplement (PMC3118799; doi:10.1111/j.1365-2443.2011.01491.x), 2011-04
Supplement: gtc0016-0343-SD3.pdf [file gtc0016-0343-SD3.pdf]

**Table S2** List of primers used to construct vectors

| Construct name          | Used primer pair |                                                                   |
|-------------------------|------------------|-------------------------------------------------------------------|
| pA68-DsRed              | forward          | 5'-CCCTCGAGACCATGTGGGTCATGGAGCCTCG-3'                             |
|                         | reverse          | 5'-TGGAATTCTTACACTTTAGGATCCGTGAGAG-3'                             |
| pB118-DsRed             | forward          | 5'-CCCTCGAGACCATGATGCCCCAACCTTCCTC-3'                             |
|                         | reverse          | 5'-AGGAATTCTCACACTTTCTGTGGGAGAGA-3'                               |
| pluc-DsRed              | forward          | 5'-AACCTCGAGATGGAAGACGCCAAAAACAT-3'                               |
|                         | reverse          | 5'-AGGAATTCTTAGAGGTCTCGATCCCACTT-3'                               |
| pCXSN-A68               | forward          | 5'-CCCTCGAGACCATGTGGGTCATGGAGCCTCG-3'                             |
|                         | reverse          | 5'-AAGCGCCGCTTACACTTTAGGATCCGTGAGAG-3'                            |
| pCXSN-A68-HA            | forward          | 5'-CCCTCGAGACCATGTGGGTCATGGAGCCTCG-3'                             |
|                         | reverse          | 5'-AAGCGCCGCTTAAGCGTAATCTGGAACATCGTATGGGTACACTTTAGGATCCGTGAGAG-3' |
| pCXSN-equine $\beta$ 2m | forward          | 5'-CCCTCGAGACCATGGCTCGCGTCGTGGCGCT-3'                             |
|                         | reverse          | 5'-AAGCGCCGCTCAGAGGTCTCGATCCCACTTAAC-3'                           |
| pCXSN-gD                | forward          | 5'-CCCTCGAGACCATGTCTACCTTCAAGCTTAT-3'                             |
|                         | reverse          | 5'-AAGCGCCGCTTACGGAAGCTGGGTATATTTAAC-3'                           |
| pME18S-A68-IgG Fc       | forward          | 5'-CCCTCGAGGGCTCCCACTCCATGATGTA-3'                                |
|                         | reverse          | 5'-CCCTCGAGCCATCTCAGGGTGACGGGCTC-3'                               |
| pME18S-gD-IgG Fc        | forward          | 5'-CCCTCGAGGCGGTTTCGAGGACGCCAGG-3'                                |
|                         | reverse          | 5'-CCCTCGAGACCGACGCTGATGCCACA-3'                                  |
| pENTR-H1-sh $\beta$ 2m1 | forward          | 5'-TCCGTTGGGTGACGTGAGTAAACCTTTTTGGAAATCTAGACCCAGCTTTCTTG-3'       |
|                         | reverse          | 5'-CAGCACACGTTGAGTGACATGAGCAAACCGGGGATCTGTGGTCTCATAACAGAAC-3'     |
| pENTR-H1-sh $\beta$ 2m2 | forward          | 5'-TCCGTTGGAACCCAGAGACATAGCTTTTTGGAAATCTAGACCCAGCTTTCTTG-3'       |
|                         | reverse          | 5'-CAGCACACGTTGAAACCCAGAGACACAGCGGGGATCTGTGGTCTCATAACAGAAC-3'     |
| pENTR-H1-sh $\beta$ 2m3 | forward          | 5'-TCCGTTGGCATCCAAGCAGACCACTTTTTGGAAATCTAGACCCAGCTTTCTTG-3'       |
|                         | reverse          | 5'-CAGCACACGTTGACATCCAAGCAAACCACGGGGATCTGTGGTCTCATAACAGAAC-3'     |
| pENTR-H1-sh $\beta$ 2m4 | forward          | 5'-TCCGTTGAAATTGAGACACATAGCTTTTTGGAAATCTAGACCCAGCTTTCTTG-3'       |
|                         | reverse          | 5'-CAGCACACGTTGAAACTGAGACACACAGCGGGGATCTGTGGTCTCATAACAGAAC-3'     |
| pENTR-H1-shluc          | forward          | 5'-TCCGATTAAGACGACTCGAAATCTTTTTGGAAATCTAGACCCAGCTTTCTTG-3'        |
|                         | reverse          | 5'-CAGCACACGTATCAAGACGACCCGAAATCGGGGATCTGTGGTCTCATAACAGAAC-3'     |
